# Supplementary material for: The Fusion of CLEC12A and MIR223HG Arises from a trans-Splicing Event in Normal and Transformed Human Cells
Source: MDPI journal article supplement (doi:10.3390/ijms222212178), 2021-11-10
Supplement: s1 [file s1]

**Supplementary Table S1:** A list of fusion events involving *CLEC12A* in the PBMCs of CML patients.

| Left Gene      | Left break point | Right break point | Right gene      |
|----------------|------------------|-------------------|-----------------|
| <i>CLEC12A</i> | 12:9951356:+     | 7:770471:+        | <i>DNAAF5</i>   |
| <i>CLEC12A</i> | 12:9982129:+     | 21:33567157:+     | <i>SON</i>      |
| <i>CLEC12A</i> | 12:9982129:+     | X:66020127:+      | <i>MIR223HG</i> |
| <i>CLEC12A</i> | 12:9982129:+     | 1:185305643:-     | <i>IVNS1ABP</i> |
| <i>CLEC12A</i> | 12:9982129:+     | 16:89647331:-     | <i>CHMP1A</i>   |
| <i>CLEC12A</i> | 12:9982129:+     | 22:36305102:-     | <i>MYH9</i>     |
| <i>CLEC12A</i> | 12:9982129:+     | 6:35869901:-      | <i>SRPK1</i>    |
| <i>CLEC12A</i> | 12:9982129:+     | 1:1390865:-       | <i>CCNL2</i>    |
| <i>CTD</i>     | 14:38194142:-    | 12:9971577:+      | <i>CLEC12A</i>  |

**Supplementary Table S2:** Cellular localization of interactors of *CLEC12A* and *CLEC12A-MIR223HG* identified with pull down/mass spectrometry (based on Uniprot).

| Protein | Interactor                      | Localization                   |
|---------|---------------------------------|--------------------------------|
| CALX    | <i>CLEC12A-MIR223HG</i>         | Endoplasmic reticulum membrane |
| XPO5    | <i>CLEC12A</i>                  | Cytoplasm                      |
| RHG04   | <i>CLEC12A-MIR223HG</i>         | Cytoplasm                      |
| PSA5    | <i>CLEC12A/CLEC12A-MIR223HG</i> | Cytoplasm                      |
| A2MG    | <i>CLEC12A-MIR223HG</i>         | Secreted                       |
| RCN2    | <i>CLEC12A-MIR223HG</i>         | Endoplasmic reticulum lumen    |
| RASL3   | <i>CLEC12A-MIR223HG</i>         | Cytoplasm                      |
| LUC7L   | <i>CLEC12A-MIR223HG</i>         | Nucleus                        |

**Supplementary Table S3:** A list of primers used in this study.

| Primer name                                    | Primer sequence                  |
|------------------------------------------------|----------------------------------|
| CLEC12A-MIR223HG-Fwd/<br>Primer A/ qPCR primer | GGCTGGGATTATCTCCTGAAG            |
| CLEC12A-MIR223HG-Rev/<br>Primer B/ qPCR primer | TTAGGCAGATGGCTGGTTG              |
| CLEC12A-Rev/ qPCR primer                       | TGTTATTTAAGTCAGGTGCGTTTC         |
| MIR223HG-F                                     | AATGAGGCATTTGCCATACC             |
| MIR223HG -R                                    | TGAAAAGAGGAAAAGATCTCCA           |
| hB2M-F/ qPCR primer                            | TGCCGTGTGAACCATGTGAC             |
| hB2M-R/ qPCR primer                            | CGGCATCTTCAAACCTCCAT             |
| Primer C                                       | AGTGCATATATTTATTGCAGCATCTGGATC   |
| Primer D                                       | TGAACTCCTCAGTGCATATATTTATTGCAGC  |
| Primer E                                       | GTCAGGCCTGTGAACTCCTCAG           |
| Primer F                                       | GAAAGGAGACCAAAAAGTCAGGCCTG       |
| Primer G                                       | GGCTCATTTGCAGACATATGGGTGATTGGTAC |
| Primer H                                       | GAGAAGAAATGTACTATTCCCAACA        |
| Primer I                                       | TTGGGGTTTGGGAAATTAGC             |
| SAM-CLEC12A                                    | CACTCACTAATCTGCAGCTG             |

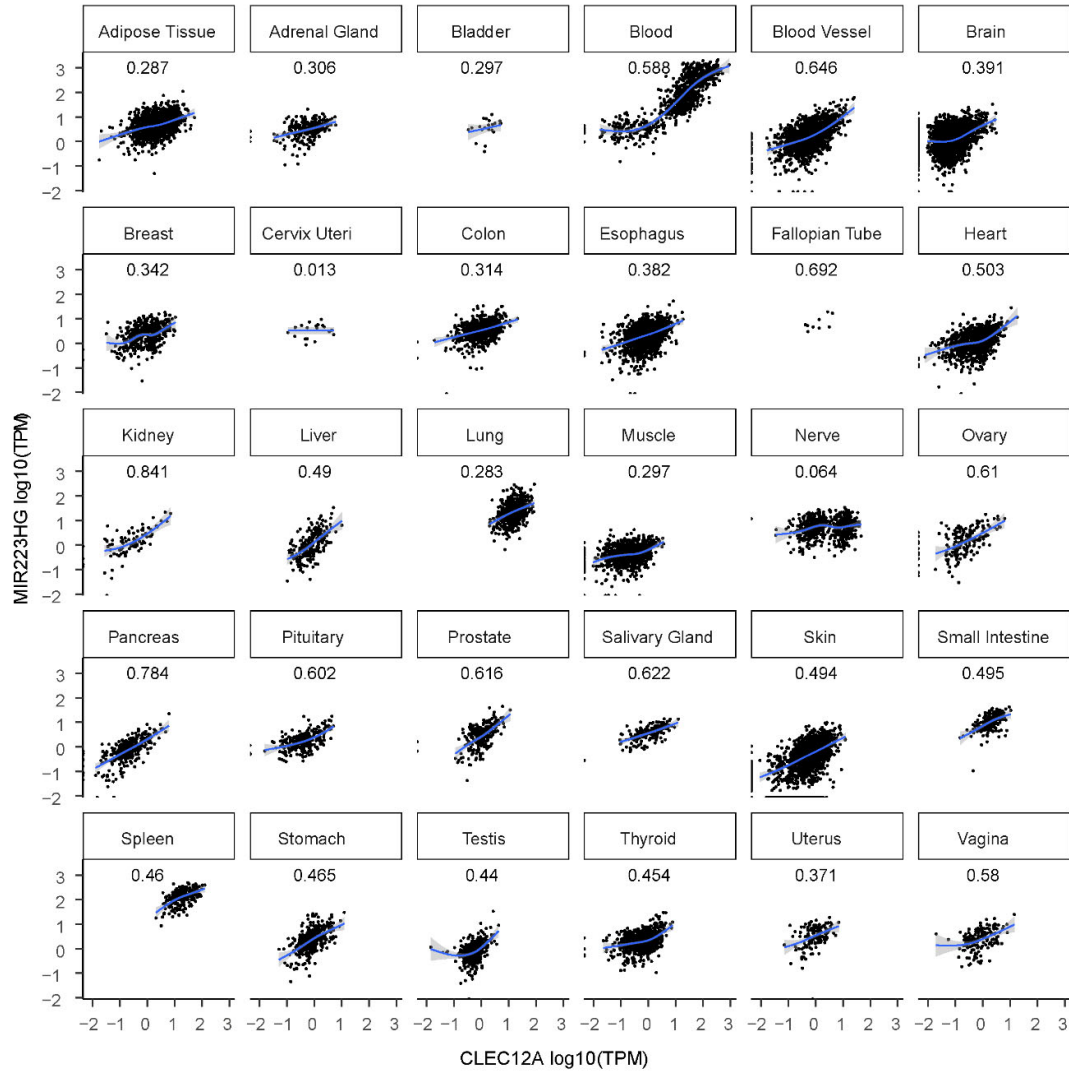

**Figure S1:** Scatterplots illustrating correlation between *CLEC12A* and *MIR223HG* expression in individual tissues. Transcripts per million (TPM) values were received from the GTex Portal (V8, [gtexportal.org](https://gtexportal.org)). Correlation coefficient was determined using Pearson correlation.

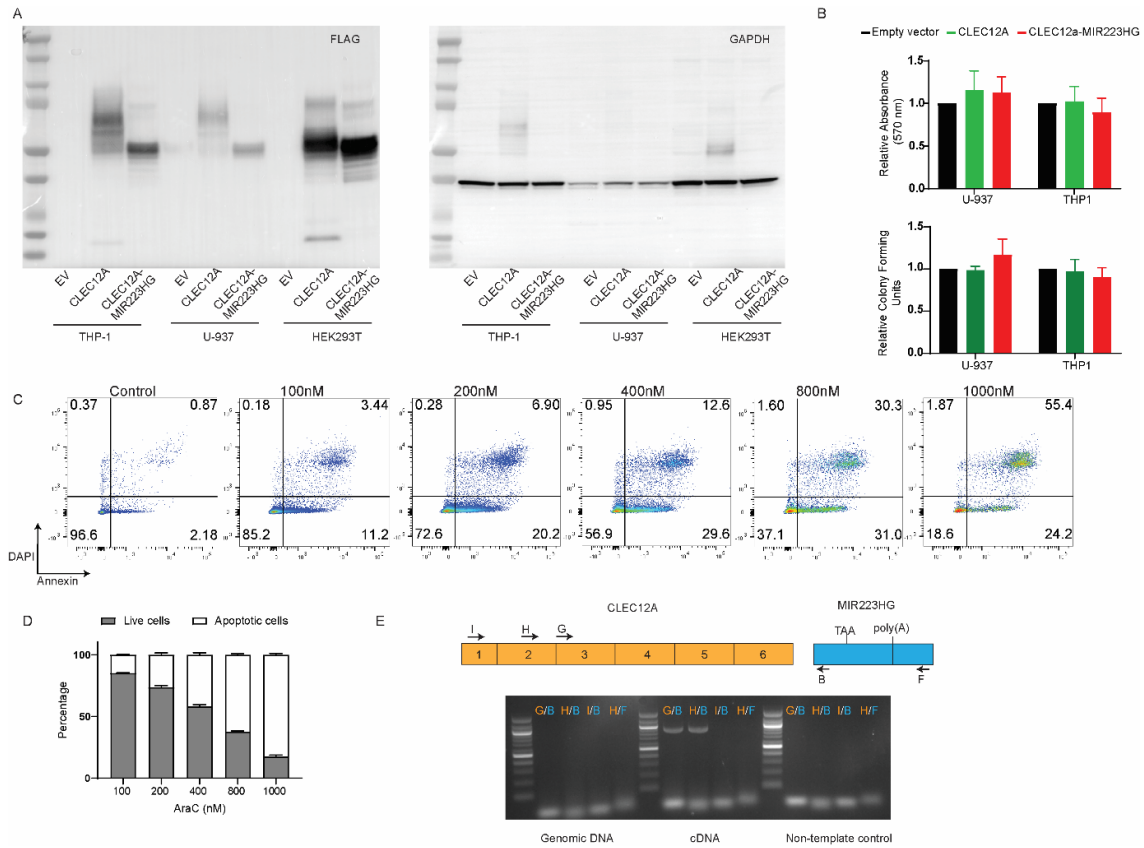

**Figure S2 (A)** Western blot analysis of lentivirus-mediated overexpression of *CLEC12A* and *CLEC12A-MIR223HG* in THP1, U-937 and HEK293T cell lines. **(B)** MTT and clonogenicity assays on THP1 and U-937 cell lines overexpressing either *CLEC12A* or *CLEC12A-MIR223HG*. **(C)** Dose-dependent increase in the apoptosis of U-937 cells treated with cytarabine (AraC). Representative flow plots are shown at different cytarabine (AraC) doses. **(D)** Percentage of apoptotic U-937 cells treated with different concentrations of AraC. **(E)** PCR on the genomic DNA and cDNA of U-937 cells to detect *CLEC12A-MIR223HG*. Expected amplicons sizes are as follows: G/B: 962 bp and H/B: 829 bp.
